# Supplementary material
Source: ML conference proceedings conference paper supplement (https://proceedings.neurips.cc/paper_files/paper/2021/hash/7d3010c11d08cf990b7614d2c2ca9098-Abstract.html)
Supplement: Supplementary file 1 [file 7d3010c11d08cf990b7614d2c2ca9098-Supplemental.zip]

Archive with 10 entries (9 files):
- GASSL_Supplementary Material/
- GASSL_Supplementary Material/appendix.pdf
- GASSL_Supplementary Material/conv.py
- GASSL_Supplementary Material/gassl.py
- GASSL_Supplementary Material/gnn.py
- GASSL_Supplementary Material/main.py
- GASSL_Supplementary Material/mainOGB.py
- GASSL_Supplementary Material/OGBconv.py
- GASSL_Supplementary Material/OGBgnn.py
- GASSL_Supplementary Material/README.md
