# Supplementary material
Source: ML conference proceedings conference paper supplement (https://proceedings.neurips.cc/paper_files/paper/2021/hash/7d3010c11d08cf990b7614d2c2ca9098-Abstract.html)
Supplement: Supplementary file 1 [file 7d3010c11d08cf990b7614d2c2ca9098-Supplemental.zip › GASSL_Supplementary Material/conv.py]

import torch
from torch_geometric.nn import MessagePassing
import torch.nn.functional as F
from torch_geometric.nn import global_mean_pool, global_add_pool
from ogb.graphproppred.mol_encoder import AtomEncoder,BondEncoder
from torch_geometric.utils import degree
from torch import nn
from torch_geometric.nn.conv import GCNConv as originGCNConv
import math
import pdb

### GIN convolution along the graph structure
class GINConv(MessagePassing):
    def __init__(self, emb_dim):
        '''
            emb_dim (int): node embedding dimensionality
        '''

        super(GINConv, self).__init__(aggr = "add")

        self.mlp = torch.nn.Sequential(torch.nn.Linear(emb_dim, 2*emb_dim), torch.nn.BatchNorm1d(2*emb_dim), torch.nn.ReLU(), torch.nn.Linear(2*emb_dim, emb_dim))
        self.eps = torch.nn.Parameter(torch.Tensor([0]))
        self.edge_encoder = torch.nn.Linear(4, emb_dim)
        self.bond_encoder = BondEncoder(emb_dim = emb_dim)

    def forward(self, x, edge_index, edge_attr):
        if edge_attr is not None:
            edge_embedding = self.edge_encoder(edge_attr)
            out = self.mlp((1 + self.eps) *x + self.propagate(edge_index, x=x, edge_attr=edge_embedding))
        else:
            out = self.mlp((1 + self.eps) * x + self.propagate(edge_index, x=x, edge_attr=None))
        return out

    def message(self, x_j, edge_attr):
        if edge_attr is not None:
            return F.relu(x_j + edge_attr)
        return F.relu(x_j)

    def update(self, aggr_out):
        return aggr_out

### GCN convolution along the graph structure
class GCNConv(MessagePassing):
    def __init__(self, emb_dim):
        super(GCNConv, self).__init__(aggr='add')

        self.linear = torch.nn.Linear(emb_dim, emb_dim)
        self.root_emb = torch.nn.Embedding(1, emb_dim)
        self.edge_encoder = torch.nn.Linear(4, emb_dim)
        self.bond_encoder = BondEncoder(emb_dim=emb_dim)

    def forward(self, x, edge_index, edge_attr):
        x = self.linear(x)
        if edge_attr is not None:
            #edge_embedding = self.bond_encoder(edge_attr)
            edge_embedding = self.edge_encoder(edge_attr)
        row, col = edge_index

        #edge_weight = torch.ones((edge_index.size(1), ), device=edge_index.device)
        deg = degree(row, x.size(0), dtype = x.dtype) + 1
        deg_inv_sqrt = deg.pow(-0.5)
        deg_inv_sqrt[deg_inv_sqrt == float('inf')] = 0

        norm = deg_inv_sqrt[row] * deg_inv_sqrt[col]
        if edge_attr is not None:
            return self.propagate(edge_index, x=x, edge_attr = edge_embedding, norm=norm) + F.relu(x + self.root_emb.weight) * 1./deg.view(-1,1)
        else:
            return self.propagate(edge_index, x=x, edge_attr=None, norm=norm) + F.relu(
                x + self.root_emb.weight) * 1. / deg.view(-1, 1)

    def message(self, x_j, edge_attr, norm):
        if edge_attr is None:
            return norm.view(-1, 1) * F.relu(x_j)
        return norm.view(-1, 1) * F.relu(x_j + edge_attr)

    def update(self, aggr_out):
        return aggr_out


### GNN to generate node embedding
class GNN_node(torch.nn.Module):
    """
    Output:
        node representations
    """
    def __init__(self, num_layer, emb_dim, drop_ratio = 0.0, JK = "last", residual = False, gnn_type = 'gin', feat_dim = None, perturb_position='X'):
        '''
            emb_dim (int): node embedding dimensionality
            num_layer (int): number of GNN message passing layers

        '''

        super(GNN_node, self).__init__()
        self.num_layer = num_layer
        self.drop_ratio = drop_ratio
        self.JK = JK
        ### add residual connection or not
        self.residual = residual
        self.fc = nn.Linear(feat_dim, emb_dim, bias=False)
        self.perturb_position = perturb_position
        if self.num_layer < 2:
            raise ValueError("Number of GNN layers must be greater than 1.")

        #self.atom_encoder = AtomEncoder(emb_dim)
        self.node_encoder = torch.nn.Embedding(feat_dim, emb_dim)  # uniform input node embedding

        ###List of GNNs
        self.convs = torch.nn.ModuleList()
        self.batch_norms = torch.nn.ModuleList()

        for layer in range(num_layer):
            if gnn_type == 'gin':
                self.convs.append(GINConv(emb_dim))
            elif gnn_type == 'gcn':
                self.convs.append(GCNConv(emb_dim))
            else:
                ValueError('Undefined GNN type called {}'.format(gnn_type))
                
            self.batch_norms.append(torch.nn.BatchNorm1d(emb_dim))

    def forward(self, batched_data, perturb=None):
        x, edge_index, edge_attr, batch = batched_data.x, batched_data.edge_index, batched_data.edge_attr, batched_data.batch

        ### computing input node embedding
        tmp = self.fc(x)
        if self.perturb_position == 'X' and perturb is not None:
            tmp = self.fc(x) + perturb

        h_list = [tmp]

        for layer in range(self.num_layer):

            h = self.convs[layer](h_list[layer], edge_index, edge_attr)
            h = self.batch_norms[layer](h)

            if self.perturb_position == 'H':
                if layer == 0 and perturb is not None:
                    h += perturb

            if layer == self.num_layer - 1:
                #remove relu for the last layer
                h = F.dropout(h, self.drop_ratio, training = self.training)
            else:
                h = F.dropout(F.relu(h), self.drop_ratio, training = self.training)

            if self.residual:
                h += h_list[layer]

            h_list.append(h)

        ### Different implementations of Jk-concat
        if self.JK == "last":
            node_representation = h_list[-1]
        elif self.JK == "sum":
            node_representation = 0
            for layer in range(self.num_layer):
                node_representation += h_list[layer]

        return node_representation
