# Supplementary material
Source: ML conference proceedings conference paper supplement (https://proceedings.neurips.cc/paper_files/paper/2021/hash/7d3010c11d08cf990b7614d2c2ca9098-Abstract.html)
Supplement: Supplementary file 1 [file 7d3010c11d08cf990b7614d2c2ca9098-Supplemental.zip › GASSL_Supplementary Material/OGBgnn.py]

import torch
from torch_geometric.nn import MessagePassing
from torch_geometric.nn import global_add_pool, global_mean_pool, global_max_pool, GlobalAttention, Set2Set
import torch.nn.functional as F
from torch_geometric.nn.inits import uniform

from OGBconv import GNN_node

from torch_scatter import scatter_mean

class GNN(torch.nn.Module):

    def __init__(self, num_tasks, num_layer = 5, emb_dim = 300, 
                    gnn_type = 'gin', virtual_node = True, residual = False, drop_ratio = 0.5, JK = "last", graph_pooling = "sum", feat_dim = None,
                 perturb_position='X'):
        '''
            num_tasks (int): number of labels to be predicted
            virtual_node (bool): whether to add virtual node or not
        '''

        super(GNN, self).__init__()

        self.num_layer = num_layer
        self.drop_ratio = drop_ratio
        self.JK = JK
        self.emb_dim = emb_dim
        self.num_tasks = num_tasks
        self.graph_pooling = graph_pooling

        if self.num_layer < 2:
            raise ValueError("Number of GNN layers must be greater than 1.")

        ### GNN to generate node embeddings
        if virtual_node:
            self.gnn_node = GNN_node_Virtualnode(num_layer, emb_dim, JK = JK, drop_ratio = drop_ratio, residual = residual, gnn_type = gnn_type, perturb_position=perturb_position)
        else:
            self.gnn_node = GNN_node(num_layer, emb_dim, JK = JK, drop_ratio = drop_ratio, residual = residual, gnn_type = gnn_type, feat_dim=feat_dim, perturb_position=perturb_position)


        ### Pooling function to generate whole-graph embeddings
        if self.graph_pooling == "sum":
            self.pool = global_add_pool
        elif self.graph_pooling == "mean":
            self.pool = global_mean_pool
        elif self.graph_pooling == "max":
            self.pool = global_max_pool
        elif self.graph_pooling == "attention":
            self.pool = GlobalAttention(gate_nn = torch.nn.Sequential(torch.nn.Linear(emb_dim, 2*emb_dim), torch.nn.BatchNorm1d(2*emb_dim), torch.nn.ReLU(), torch.nn.Linear(2*emb_dim, 1)))
        elif self.graph_pooling == "set2set":
            self.pool = Set2Set(emb_dim, processing_steps = 2)
        else:
            raise ValueError("Invalid graph pooling type.")

        if graph_pooling == "set2set":
            self.graph_pred_linear = torch.nn.Linear(2*self.emb_dim, self.num_tasks)
        else:
            self.graph_pred_linear = torch.nn.Linear(self.emb_dim, self.num_tasks)

    def forward(self, batched_data, perturb=None):
        h_node = self.gnn_node(batched_data, perturb)
        h_graph = self.pool(h_node, batched_data.batch)
        return h_graph

if __name__ == '__main__':
    GNN(num_tasks = 10)
