# Supplementary material
Source: ML conference proceedings conference paper supplement (https://proceedings.neurips.cc/paper_files/paper/2021/hash/7d3010c11d08cf990b7614d2c2ca9098-Abstract.html)
Supplement: Supplementary file 1 [file 7d3010c11d08cf990b7614d2c2ca9098-Supplemental.zip › GASSL_Supplementary Material/README.md]

# GASSL

## TU datasets

TU datasets including MUTAG, PTC-MR, IMDB-BINARY, IMDB-MULTI, COLLAB, NCI1.

**GASSL+gcn** with perturbation on hidden layer
        
    python main.py --dataset MUTAG --gnn gcn --m 3 --seed 312 --lr 1e-4 --pp H --device 0

**GASSL+gin** with perturbation on hidden layer
        
    python main.py --dataset MUTAG --gnn gin --m 3 --seed 312 --lr 1e-4 --pp H --device 0

**GASSL+gcn** with perturbation on initial node features
        
    python main.py --dataset MUTAG --gnn gcn --m 3 --seed 312 --lr 1e-4 --pp X --device 0

**GASSL+gin** with perturbation on initial node features
        
    python main.py --dataset MUTAG --gnn gin --m 3 --seed 312 --lr 1e-4 --pp X --device 0

## OGB datasets

OGB datasets including ogbg-molhiv, ogbg-moltox21, ogbg-moltoxcast, ogbg-molbbbp.

**GASSL+gcn** with perturbation on hidden layer
        
    python mainOGB.py --dataset ogbg-molhiv --gnn gcn --m 3 --seed 312 --lr 1e-4 --pp H --device 0

**GASSL+gin** with perturbation on hidden layer
        
    python mainOGB.py --dataset ogbg-molhiv --gnn gin --m 3 --seed 312 --lr 1e-4 --pp H --device 0

**GASSL+gcn** with perturbation on initial node features
        
    python mainOGB.py --dataset ogbg-molhiv --gnn gcn --m 3 --seed 312 --lr 1e-4 --pp X --device 0

**GASSL+gin** with perturbation on initial node features
        
    python mainOGB.py --dataset ogbg-molhiv --gnn gin --m 3 --seed 312 --lr 1e-4 --pp X --device 0
